# Supplementary material for: DNA mediated assembly of single walled carbon nanotubes: role of DNA linkers and annealing
Source: Royal Society of Chemistry journal article supplement (doi:10.1039/c0cp02815k), 2011-01-01
Supplement: c0cp02815k.pdf [file c0cp02815k.pdf]

## Supplementary Section

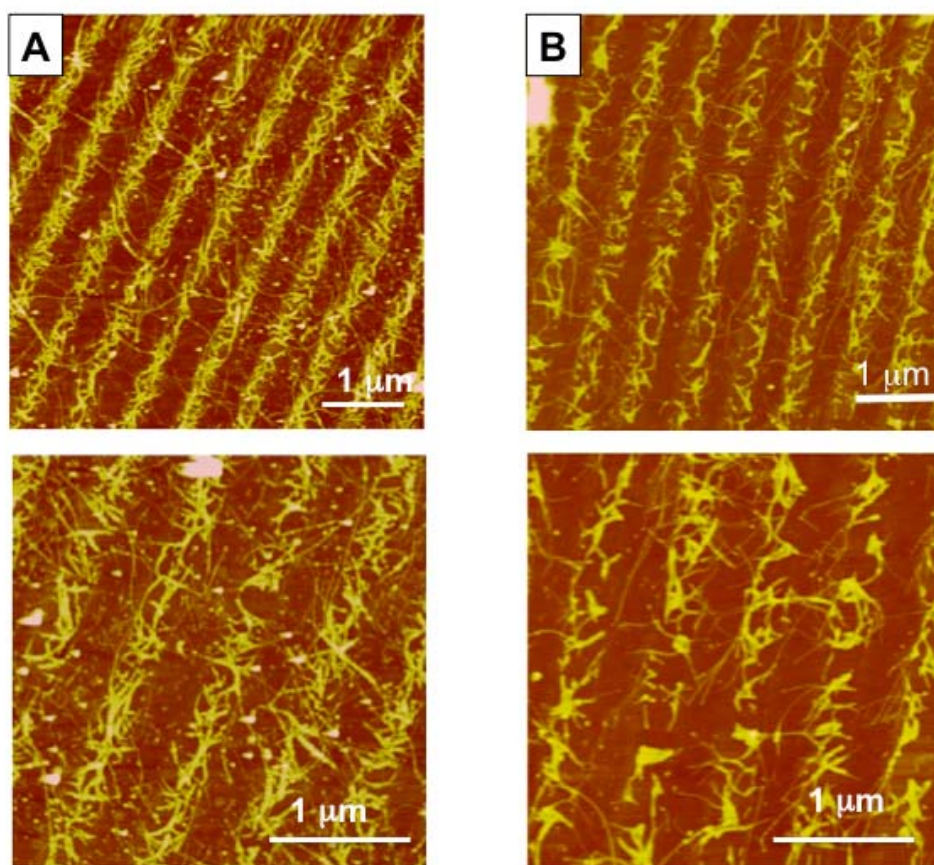

Supplementary Figure 1. (A) AFM images of T<sub>30</sub>-(TC)<sub>7</sub> dispersed CNTs adsorbed on printed (AG)<sub>7</sub> lines from buffers containing 100mM NaCl (top: 5 µm x 5 µm. bottom: 3 µm x 3 µm) (B) AFM images of T<sub>40</sub>-(TC)<sub>7</sub> dispersed CNTs adsorbed on printed (AG)<sub>7</sub> lines from buffers containing 100mM NaCl. top: 5 µm x 5 µm. bottom: 3 µm x 3 µm)
